# Supplementary material for: Revaccination in Age-Risk Groups with Sputnik V Is Immunologically Effective and Depends on the Initial Neutralizing SARS-CoV-2 IgG Antibodies Level
Source: MDPI journal article supplement (doi:10.3390/vaccines11010090), 2022-12-30
Supplement: s1 [file s1]

## Supplementary

**Table S1. The increasing coefficient in the group of 500-2000 BAU/ml with a smaller division**

| Antibody level before revaccination (BAU/мл) | Antibody level, BAU/мл |                        |                        | p (Wilcoxon criterion)                                                       | Antibody level increasing, times |                       |
|----------------------------------------------|------------------------|------------------------|------------------------|------------------------------------------------------------------------------|----------------------------------|-----------------------|
|                                              | n                      | After RV1, Me[IQR]     | After RV2, Me[IQR]     |                                                                              | After RV1, Me[IQR]               | After RV2 Me[IQR]     |
| Without COVID-19 history                     |                        |                        |                        |                                                                              |                                  |                       |
| 500-1000                                     | 540                    | 724<br>[465 – 1080]    | 772<br>[523 – 1280]    | p <sub>12</sub> =0.033*<br>p <sub>13</sub> <0.001*<br>p <sub>23</sub> =0.072 | 1.00<br>[0.67 – 1.50]            | 1.10<br>[0.73 – 1.74] |
| 1000-1500                                    | 277                    | 1190<br>[875 – 1630]   | 1220<br>[780 – 1830]   | p <sub>12</sub> =1.000<br>p <sub>13</sub> =0.357<br>p <sub>23</sub> =0.405   | 0.96<br>[0.70 – 1.36]            | 1.00<br>[0.63 – 1.54] |
| 1500-2000                                    | 145                    | 1520<br>[811 – 2230]   | 1470<br>[946 – 2500]   | p <sub>12</sub> =0.252<br>p <sub>13</sub> =1.000<br>p <sub>23</sub> =0.687   | 0.86<br>[0.46 – 1.25]            | 0.87<br>[0.56 – 1.45] |
| With COVID-19 history                        |                        |                        |                        |                                                                              |                                  |                       |
| 500-1000                                     | 91                     | 789<br>[465 – 1220]    | 781<br>[485 – 1225]    | p <sub>12</sub> =0.075<br>p <sub>13</sub> =0.177<br>p <sub>23</sub> =0.993   | 1.15<br>[0.71 – 1.52]            | 1.01<br>[0.70 – 1.67] |
| 1000-1500                                    | 64                     | 1115<br>[779.5 – 1390] | 1260<br>[775.5 – 1840] | p <sub>12</sub> =0.555<br>p <sub>13</sub> =1.000<br>p <sub>23</sub> =0.657   | 0.93<br>[0.66 – 1.14]            | 0.99<br>[0.68 – 1.36] |
| 1500-2000                                    | 46                     | 1505<br>[943 – 2070]   | 1310<br>[934 – 1750]   | p <sub>12</sub> =1.000<br>p <sub>13</sub> =0.030*<br>p <sub>23</sub> =1.000  | 0.85<br>[0.62 – 1.22]            | 0.79<br>[0.58 – 1.03] |
